# Supplementary material for: Healthcare Utilization and Costs in Sepsis Survivors in Germany–Secondary Analysis of a Prospective Cohort Study
Source: MDPI journal article supplement (doi:10.3390/jcm11041142), 2022-02-21
Supplement: s1 [file s1]

**Table S1.** Description of costing dataset.

| <b>Inpatient utilization</b>    |                                                                                                                                                                                                                                                                                                                                                | <b>Costs per unit [€]</b> |
|---------------------------------|------------------------------------------------------------------------------------------------------------------------------------------------------------------------------------------------------------------------------------------------------------------------------------------------------------------------------------------------|---------------------------|
| Hospitalization                 | Costs/ days of inpatient treatment (including ICUs and psychiatric hospitals) assessed by standardized cost unit rates according to Bock et al. [1]                                                                                                                                                                                            | 593.04                    |
| Rehabilitation                  | Costs/ days of inpatient rehabilitative care (excluding outpatient rehabilitative care) assessed by standardized cost unit rates according to Bock et al. [1]                                                                                                                                                                                  | 121.85                    |
| <b>Outpatient utilization</b>   |                                                                                                                                                                                                                                                                                                                                                | <b>Costs per unit [€]</b> |
| PCP visits                      | Mean costs per PCP contact, being defined as total of medical fees/ number of contacts [3]                                                                                                                                                                                                                                                     | 20.06                     |
| Specialty visits                | Mean costs per contact, being defined as total of medical fees/ number of contacts [3]                                                                                                                                                                                                                                                         |                           |
|                                 | Internal specialists                                                                                                                                                                                                                                                                                                                           | 65.44                     |
|                                 | Surgeons                                                                                                                                                                                                                                                                                                                                       | 43.39                     |
|                                 | Urologists                                                                                                                                                                                                                                                                                                                                     | 24.70                     |
|                                 | Neurologists/Psychiatrists                                                                                                                                                                                                                                                                                                                     | 44.72                     |
|                                 | ENT specialists                                                                                                                                                                                                                                                                                                                                | 26.40                     |
|                                 | Ophthalmologists                                                                                                                                                                                                                                                                                                                               | 34.78                     |
|                                 | Dermatologists                                                                                                                                                                                                                                                                                                                                 | 18.89                     |
|                                 | Orthopedists                                                                                                                                                                                                                                                                                                                                   | 25.42                     |
|                                 | Psychotherapists                                                                                                                                                                                                                                                                                                                               | 78.08                     |
| Medication                      | Costs were estimated using the “Lauer-Taxe” database [2]. When not specified, a package size of N3 was assumed, equating a quantity for a treatment of 100 days.                                                                                                                                                                               |                           |
| Diagnostic Testing              | Costs were estimated using the reimbursement scheme provided by the National Association of Statutory Health Insurance Physicians [3]. Costs for body-imaging were taken from the EBM of Radiology, for non-imaging diagnostics the EBM schemes of the particular specialties (e.g. Internal Medicine, Neurology, Nuclear Medicine) were used. |                           |
| Allied Health Visits            | Standard value of contact according to the “GKV-Heilmittelinformationssystem”[4]                                                                                                                                                                                                                                                               |                           |
|                                 | Occupational therapy                                                                                                                                                                                                                                                                                                                           | 37.51                     |
|                                 | Physiotherapy                                                                                                                                                                                                                                                                                                                                  | 16.42                     |
|                                 | Speech therapy                                                                                                                                                                                                                                                                                                                                 | 38.59                     |
|                                 | Podologist therapy                                                                                                                                                                                                                                                                                                                             | 27.51                     |
| Durable Medical Equipment (DME) | Valuation rates according to the Remedy and Aid report of the Barmer GEK health insurance [5]                                                                                                                                                                                                                                                  |                           |
|                                 | Walking frames                                                                                                                                                                                                                                                                                                                                 | 52.74                     |
|                                 | Utilities for elastic compression                                                                                                                                                                                                                                                                                                              | 140.66                    |
|                                 | Utilities for incontinence treatment                                                                                                                                                                                                                                                                                                           | 346.43                    |
|                                 | Vehicles                                                                                                                                                                                                                                                                                                                                       | 720.49                    |
|                                 | Utilities for bathing/showering                                                                                                                                                                                                                                                                                                                | 153.37                    |

**Table S2:** Prescription of analgesics and antidepressants, comparisons between groups with both cross sectional data available at three months before sepsis and six, 12 and 24 months post ICU respectively.

|                            | <b>3 months before sepsis</b> | <b>6 months post ICU</b>     |
|----------------------------|-------------------------------|------------------------------|
| <b>Analgesics</b>          | <i>n</i> = 194 (missing: 30)  | <i>n</i> = 194 (missing: 12) |
| ≥one prescription, No. (%) | 35 (21.3%)                    | 53 (29.1%)                   |
| no prescription, No. (%)   | 129 (78.7%)                   | 129 (70.9%)                  |
| <b>Antidepressants</b>     | <i>n</i> = 194 (missing: 30)  | <i>n</i> = 194 (missing: 12) |
| ≥one prescription, No. (%) | 11 (6.7%)                     | 35 (19.2%)                   |
| no prescription, No. (%)   | 153 (93.3%)                   | 147 (80.8%)                  |

|                            | <b>3 months before sepsis</b> | <b>12 months post ICU</b>    |
|----------------------------|-------------------------------|------------------------------|
| <b>Analgesics</b>          | <i>n</i> = 177 (missing: 31)  | <i>n</i> = 177 (missing: 12) |
| ≥one prescription, No. (%) | 32 (23.7%)                    | 53 (30%)                     |
| no prescription, No. (%)   | 114 (64.4%)                   | 112 (63.3%)                  |
| <b>Antidepressants</b>     | <i>n</i> = 177 (missing: 31)  | <i>n</i> = 177 (missing: 12) |
| ≥one prescription, No. (%) | 11 (6.2%)                     | 24 (13.6%)                   |
| no prescription, No. (%)   | 135 (76.3%)                   | 141 (79.7%)                  |

|                            | <b>3 months before sepsis</b> | <b>24 months post ICU</b>    |
|----------------------------|-------------------------------|------------------------------|
| <b>Analgesics</b>          | <i>n</i> = 146 (missing: 25)  | <i>n</i> = 146 (missing: 28) |
| ≥one prescription, No. (%) | 27 (18.5%)                    | 43 (29.5%)                   |
| no prescription, No. (%)   | 94 (64.4%)                    | 75 (51.4%)                   |
| <b>Antidepressants</b>     | <i>n</i> = 146 (missing: 25)  | <i>n</i> = 146 (missing: 28) |
| ≥one prescription, No. (%) | 8 (5.5%)                      | 20 (13.7%)                   |
| no prescription, No. (%)   | 113 (77.4%)                   | 98 (67.1%)                   |

**Table S3.** Change in single cost categories between short - and long-term post-ICU resource utilization.

|                                                              | 0–6 Months |          |        |         | 13–24 Months |          |        |         | Difference<br>(Mean) | Difference<br>(Median) | Difference<br>(IQR) | Percentiles<br>(25; 75) | p-Value |
|--------------------------------------------------------------|------------|----------|--------|---------|--------------|----------|--------|---------|----------------------|------------------------|---------------------|-------------------------|---------|
|                                                              | Mean       | SD       | Median | IQR     | Mean         | SD       | Median | IQR     |                      |                        |                     |                         |         |
| <b>Rehospitalisation:<br/>Costs per patient (€)</b>          | 13786.6    | 23075.86 | 2965.2 | 17791.2 | 5114.41      | 10580.86 | 0.00   | 5930.40 | 8672.19              | 0.00                   | 10229.94            | (–1186.08;<br>9043.86)  | 0.001   |
| Rehospitalisation:<br>average length of stay (d)             | 23.25      | 38.91    | 5.00   | 30.0    | 8.62         | 17.84    | 0.00   | 10.00   | 14.63                | 0.00                   | 17.25               | (–2.00;<br>15.25)       | 0.001   |
| <b>Rehabilitative Care:<br/>Costs per patient (€)</b>        | 1591.37    | 2195.46  | 0.00   | 2680.7  | 311.79       | 1053.51  | 0.00   | 0.00    | 1279.58              | 0.00                   | 2558.85             | (0.00;<br>2558.85)      | 0.000   |
| <b>Medication costs per patient<br/>(€)</b>                  | 143.66     | 383.19   | 0.00   | 65.25   | 48.65        | 235.35   | 0.00   | 0.00    | 95.01                | 0.00                   | 46.8                | (0.00;<br>46.80)        | 0.012   |
| Antidepressants:<br>Costs per patient (€)                    | 17.76      | 56.07    | 0.00   | 0.00    | 2.12         | 14.15    | 0.00   | 0.00    | 15.62                | 0.00                   | 0.00                | (0.00;<br>0.00)         | 0.084   |
| Analgesics:<br>Costs per patient (€)                         | 125.91     | 376.94   | 0.00   | 45.00   | 46.53        | 234.44   | 0.00   | 0.00    | 79.38                | 0.00                   | 22.14               | (0.00;<br>22.14)        | 0.010   |
| <b>(All) allied health visits:<br/>Costs per patient (€)</b> | 177.90     | 218.26   | 164.2  | 164.2   | 139.88       | 209.30   | 0.00   | 164.20  | 38.02                | 0.00                   | 164.2               | (0.00;<br>164.20)       | 0.109   |
| <b>Medical aids:<br/>Costs per patient (€)</b>               | 234.12     | 503.67   | 0.00   | 193.4   | 230.36       | 538.39   | 0.00   | 140.66  | 3.76                 | 0.00                   | 0.0                 | (0.00;<br>0.00)         | 0.655   |

## References

1. Bock, J.O.; Brettschneider, C.; Seidl, H.; Bowles, D.; Holle, R.; Greiner, W.; König, H.H. Calculation of standardised unit costs from a societal perspective for health economic evaluation. *Gesundheitswesen* **2015**, *77*, 53–61.
2. All medication costs from LAUER-Taxe online-database (standard reference book for pharmaceuticals) LAUER-Taxe online-database, Lauer-Fischer GmbH; WEBAPO® InfoSystem, 2016. Available from: [https://www.cgm.com/deu\\_de/produkte/apotheke/lauer-taxe.html](https://www.cgm.com/deu_de/produkte/apotheke/lauer-taxe.html) (accessed on 9 February 2022).
3. Costs for diagnostics the EBM (Einheitlicher Bewertungsmaßstab), reimbursement scheme provided by the „Kassenaerztliche Bundesvereinigung“ (National Association of Statutory Health Insurance Physicians), Berlin, Germany Bundesvereinigung KK. Arztgruppen-EBM Radiologie. 2016. Available from: <https://www.kbv.de/html/85.php> (accessed on 9 February 2022).
4. GKV Spitzenverband: Heilmittel-Schnellinformation nach § 84 Abs. 5, i. V. m. Abs. 8 SGB V – Bundesbericht 2011: [https://www.gkv-heilmittel.de/media/dokumente/his\\_statistiken/2011\\_04/HIS-Bericht-Bund\\_201104.pdf](https://www.gkv-heilmittel.de/media/dokumente/his_statistiken/2011_04/HIS-Bericht-Bund_201104.pdf) (accessed on 9 February 2022).
5. Kemper, C.; Sauer, K.; Glaeske, G. *BARMER GEK Heil- und Hilfsmittelreport 2012*; BARMER GEK: Schwäbisch Gmünd, Germany, September, 2012.
