# Supplementary figures and images for: Healthcare Utilization and Costs in Sepsis Survivors in Germany–Secondary Analysis of a Prospective Cohort Study
Source: MDPI journal article supplement (doi:10.3390/jcm11041142), 2022-02-21

**Fig. S1A**

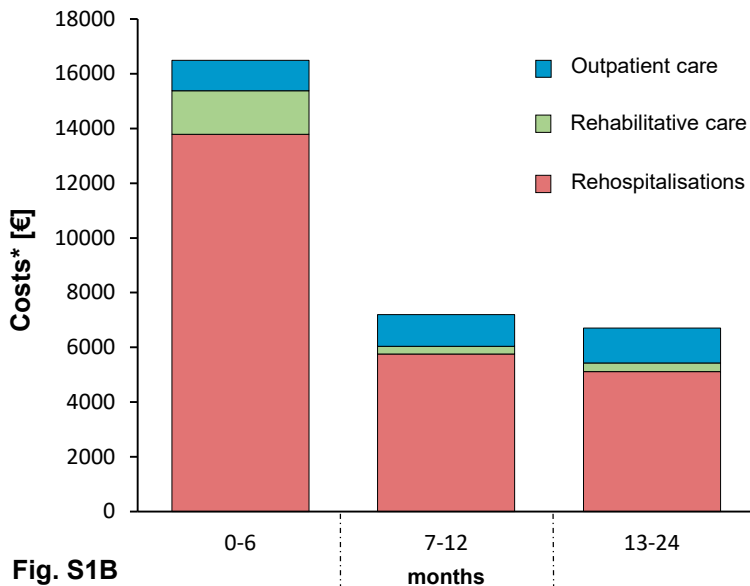

**Fig. S1B**

Outpatient cost details

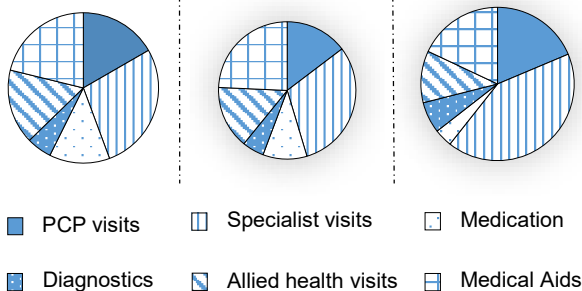

Supplement: s1 [file s1]
